# Supplementary material
Source: PubMed Central journal article supplement (PMC156312)
Supplement: pnas_0931375100_1.pdf [file pnas_0931375100_1.pdf]

Supporting information for Lu *et al.* (2003) *Proc. Natl. Acad. Sci. USA*,  
 10.1073/pnas.0931375100.

**Table 4. Fungal strains assayed for *CPS1* homologs**

| Genus*                 | Species <sup>†</sup>    | Strain or isolate <sup>‡</sup> | Ref. or source** |
|------------------------|-------------------------|--------------------------------|------------------|
| 1. <i>Cochliobolus</i> | <i>heterostrophus</i>   | C5 (race O)                    | 1                |
|                        |                         | C4 (race T)                    | 1                |
|                        | <i>carbonum</i>         | 26R13 (race 1)                 | 2                |
|                        |                         | YugY (race 2)                  | 2                |
|                        |                         | BZ1703 (race 3)                | T. Tsukiboshi    |
|                        | <i>victoriae</i>        | HvW                            | 2                |
|                        |                         | FI3                            | 2                |
|                        | <i>bicolor</i>          | DAR28333 <sup>#</sup>          | 3                |
|                        | <i>chloridis</i>        | 7620-2 <sup>#</sup>            | 3                |
|                        | <i>dactyloctenii</i>    | 7938-9 <sup>#</sup>            | 3                |
|                        | <i>homomorphus</i>      | 13409 <sup>#</sup>             | ATCC             |
|                        | <i>intermedius</i>      | 8798-3 <sup>#</sup>            | 3                |
|                        | <i>melinidis</i>        | 8795-6 <sup>#</sup>            | 3                |
|                        | <i>miyabeanus</i>       | WK-1C <sup>#</sup>             | 3                |
|                        | <i>peregrianensis</i>   | 7656-3 <sup>#</sup>            | 3                |
|                        | <i>perotidis</i>        | 7846-2 <sup>#</sup>            | 3                |
|                        | <i>ravenelii</i>        | 7979-4 <sup>#</sup>            | 3                |
|                        | <i>spicifer</i>         | D5-7 <sup>#</sup>              | 3                |
| <i>sativus</i>         | A20 <sup>#</sup>        | 3                              |                  |
| 2. <i>Pyrenophora</i>  | <i>tritici repentis</i> | Pt001 <sup>#</sup>             | G. Bergstrom     |
|                        | <i>teres</i>            | ND89-18 <sup>#§</sup>          | M. Milgroom      |
| 3. <i>Setosphaeria</i> | <i>rostrata</i>         | 32197 <sup>#</sup>             | ATCC             |
|                        | <i>turcica</i>          | NK72 <sup>§¶</sup>             | N. Keller        |
| 4. <i>Bipolaris</i>    | <i>sacchari</i>         | 764-1 <sup>#</sup>             | 3                |
|                        |                         | 1249-10 <sup>§  </sup>         | 3                |

| Genus*                    | Species†                               | Strain or isolate‡    | Ref. or source** |
|---------------------------|----------------------------------------|-----------------------|------------------|
| 5. <i>Alternaria</i>      | <i>solani</i>                          | Onondaga 1-20         | T. Zitter        |
|                           | spp.                                   | Unknown               | This lab         |
| 6. <i>Stemphglium</i>     | spp.                                   | T-37 <sup>  </sup>    | This lab         |
| 7. <i>Mycosphaerella</i>  | <i>zeae-maydis</i>                     | 3018 <sup>§**</sup>   | G. Bergstrom     |
| 8. <i>Gibberella</i>      | <i>fujikuroi</i>                       | M033                  | A. Tomas         |
|                           |                                        | M058 <sup>§</sup>     | A. Tomas         |
|                           | <i>zeae</i>                            | Z3639 <sup>§</sup>    | ** , 4           |
| 9. <i>Nectria</i>         | <i>haematococca</i>                    | 6-36                  | H. VanEtten      |
| 10. <i>Gaeumannomyces</i> | <i>graminis</i>                        | 001NY89               | CTC              |
| 11. <i>Magnaporthe</i>    | <i>grisea</i>                          | Unknown <sup>  </sup> | This lab         |
| 12. <i>Fusarium</i>       | <i>oxysporum</i> f. sp. <i>melonis</i> | NY88                  | T. Zitter        |
| 13. <i>Glomerella</i>     | <i>magna</i>                           | L2 <sup>  </sup>      | This lab         |
| 14. <i>Ustilago</i>       | <i>maydis</i>                          | Unknown <sup>  </sup> | CTC              |

\*All are filamentous ascomycetes (except *Ustilago*, a basidiomycete); 1-7 are loculoascomycetes and 8-13 pyrenomycetes.

†DNA of all species (except for *Ustilago*) hybridized to *CPS1* (see below).

‡#DNA samples are the same as those used in a previous study conducted in this lab (3).

§Gel blot results of these strains or isolates are not shown in this paper.

<sup>¶</sup>Hybridization was to a gel blot previously prepared by M. Rose, this lab.

<sup>||</sup>DNA samples were from a lab genomic DNA collection.

\*\*ATCC, American Type Culture Collection; CTC, Cornell Teaching Collection; N. Keller, University of Wisconsin; H. VanEtten, University of Arizona; A. Tomas, Pioneer Hi-Bred International; G. Bergstrom, M. Milgroom, and T. Zitter, Cornell University; T. Tsukiboshi, National Institute of Agro-Environmental Science, Japan.

†† via A. Desjardins, U.S. Department of Agriculture Agricultural Research Service North Central Region Northern Regional Research Center.

1. Leach, J., Tegtmeier, K. J., Daly, J. M. & Yoder, O. C. (1982) *Physiol. Plant Pathol.* **21**, 327-333.
2. Arie, T., Christiansen, S. K., Yoder, O. C. & Turgeon, B. G. (1997) *Fungal Genet. Biol.* **21**, 118-130.
3. Christiansen, S. K., Wirsal, S., Yun, S.-H., Yoder, O. C. & Turgeon, B. G. (1998) *Mycol. Res.* **102**, 919-929.
4. Bowden, R. L. & Leslie, J. F. (1999) *Phytopathology* **89**, 182-188.
