# Supplementary material
Source: PubMed Central journal article supplement (PMC156312)
Supplement: pnas_0931375100_2.pdf [file pnas_0931375100_2.pdf]

Supporting information for Lu *et al.* (2003) *Proc. Natl. Acad. Sci. USA*,  
 10.1073/pnas.0931375100.

**Table 5. Growth of *C. heterostrophus* WT and mutant strains on different carbon and nitrogen sources**

| Carbon source* | Growth, cm |           | Nitrogen source <sup>†</sup> | Growth, cm |           |
|----------------|------------|-----------|------------------------------|------------|-----------|
|                | WT         | 1301-R-45 |                              | WT         | 1301-R-45 |
| Glucose        | 8.0        | 8.0       | Ammonium                     | 5.0        | 5.0       |
| Xylose         | 8.0        | 8.0       | Nitrate                      | 8.0        | 8.0       |
| Sorbose        | 1.5        | 1.3       | Nitrite                      | 4.0        | 4.0       |
| Mannitol       | 8.0        | 8.0       | Arginine                     | 5.0        | 5.0       |
| Gluconate      | 4.0        | 4.0       | Glutamine                    | 8.0        | 8.0       |
| Glycerol       | 2.0        | 2.0       | Histidine                    | 5.0        | 5.0       |
| Lactate        | 4.0        | 4.0       | Methionine                   | 4.0        | 4.0       |
| Polypectate    | 7.0        | 7.0       | Tyrosine                     | 7.0        | 7.0       |
| Succinate      | 7.0        | 7.0       | Adenine                      | 5.0        | 5.0       |

Colony diameters (average of three replicates) were measured 7 days after inoculation.

WT = C4; REMI mutant R.C4.2696 represented by progeny 1301-R-45.

\*Each compound was added (10 g/liter) to MM; nitrogen source was  $\text{Ca}(\text{NO}_3)_2 \cdot 4\text{H}_2\text{O}$  at 1 g/liter.

<sup>†</sup>Each compound was added (1 g/liter) to MM; carbon source was glucose (10 g/liter).

Ammonium:  $\text{NH}_4\text{Cl}$ ; nitrate:  $\text{Ca}(\text{NO}_3)_2 \cdot 4\text{H}_2\text{O}$ ; nitrite:  $\text{NaNO}_2$ .
