# Supplementary material
Source: PubMed Central journal article supplement (PMC156312)
Supplement: pnas_0931375100_3.pdf [file pnas_0931375100_3.pdf]

**Table 6. Transformation vectors and clones used in this study**

| Plasmid, kb                                                      | Characteristics                                                                                                                                 | Reference  |
|------------------------------------------------------------------|-------------------------------------------------------------------------------------------------------------------------------------------------|------------|
| Cloning vector                                                   |                                                                                                                                                 |            |
| pUCATPH (5.1)                                                    | REMI vector containing the <i>E. coli hygB</i> gene fused to the <i>Aspergillus nidulans trpC</i> promoter                                      | 1          |
| pGPDH-Bar.1 (4.2)                                                | Vector containing the <i>Streptomyces hygroscopicus bar</i> gene fused to the <i>C. heterostrophus GPD</i> promoter                             | 2          |
| Clones recovered from the REMI insertion site in R.C4.2696       |                                                                                                                                                 |            |
| p214B7 (9.2)                                                     | Religation of <i>Bgl</i> III-digested genomic DNA                                                                                               | This study |
| p214S1 (9.3)                                                     | Religation of <i>Sac</i> I-digested genomic DNA                                                                                                 | This study |
| Clones for targeted integration in <i>C. heterostrophus</i>      |                                                                                                                                                 |            |
| p214S1N (3.3)                                                    | Religation of <i>Nar</i> I-digested p214S1; it contains a <i>Nar</i> I- <i>Sac</i> I fragment of genomic DNA ligated to pUC18                   | This study |
| p214SNP (8.4)                                                    | <i>Hind</i> III-digested pUCATPH inserted in the <i>Hind</i> III site of p214S1N                                                                | This study |
| p118BSP (7.3)                                                    | A 2.2-kb <i>Sac</i> I fragment of p118B14 in the <i>Sac</i> I site of pUCATPH                                                                   | This study |
| Clones recovered from targeted sites in <i>C. heterostrophus</i> |                                                                                                                                                 |            |
| p118B14 (10.4)                                                   | From the p214SNP integration site in C5 transformant 118 by ligation of a <i>Bgl</i> III-digested genomic fragment containing the entire vector | This study |
| p118BC4 (6.7)                                                    | From p214SNP integration site in C5.118 by ligation of <i>Bcl</i> I- digested genomic DNA containing part of vector (214SNP) sequence           | This study |
| p9P2 (7.3)                                                       | From the p118BSP integration site in C5 transformant 9 by ligation of a <i>Pst</i> I-digested genomic DNA fragment containing pUC18             | This study |

| Plasmid, kb                                           | Characteristics                                                                                                                                                 | Reference  |
|-------------------------------------------------------|-----------------------------------------------------------------------------------------------------------------------------------------------------------------|------------|
| Clones for targeted integration in <i>G. zeae</i>     |                                                                                                                                                                 |            |
| pFgC8 (4.9)                                           | PCR cloning vector carrying a 1.0-kb fragment of <i>GzCPS1</i>                                                                                                  | This study |
| pFgC8-hygB (7.1)                                      | pFgC8 plus a 2.2-kb <i>XbaI</i> fragment of pUCATPH containing the <i>hygB</i> cassette                                                                         | This study |
| Clones recovered from targeted site in <i>G. zeae</i> |                                                                                                                                                                 |            |
| p1103X (8.3)                                          | From the pFgC8-hygB integration site in transformant Tx4 by ligation of a <i>XhoI</i> -digested genomic fragment containing 5' region of <i>GzCPS1</i> (1.8 kb) | This study |
| p1102S (9.4)                                          | From the pFgC8-hygB integration site in transformant Tx4 by ligation of a <i>SpeI</i> -digested genomic fragment containing 3' region of <i>GzCPS1</i> (4.2 kb) | This study |
| pFgCPS1 (10.3)                                        | pGPDH-Bar.1 carrying the entire <i>GzCPS1</i> ORF and 5' and 3' untranslated regions                                                                            | This study |

1. Lu, S. W., Lyngholm, L., Yang, G., Bronson, C., Yoder, O. C. & Turgeon, B. G. (1994) *Proc. Natl. Acad. Sci. USA* **91**, 12649-12653.

2. Straubinger, B., Straubinger, E., Wirsal, S., Turgeon, G. & Yoder, O. (1992) *Fungal Genet. Newslett.* **39**, 82-83.
