# Supplementary material
Source: PubMed Central journal article supplement (PMC156312)
Supplement: pnas_0931375100_12.pdf [file pnas_0931375100_12.pdf]

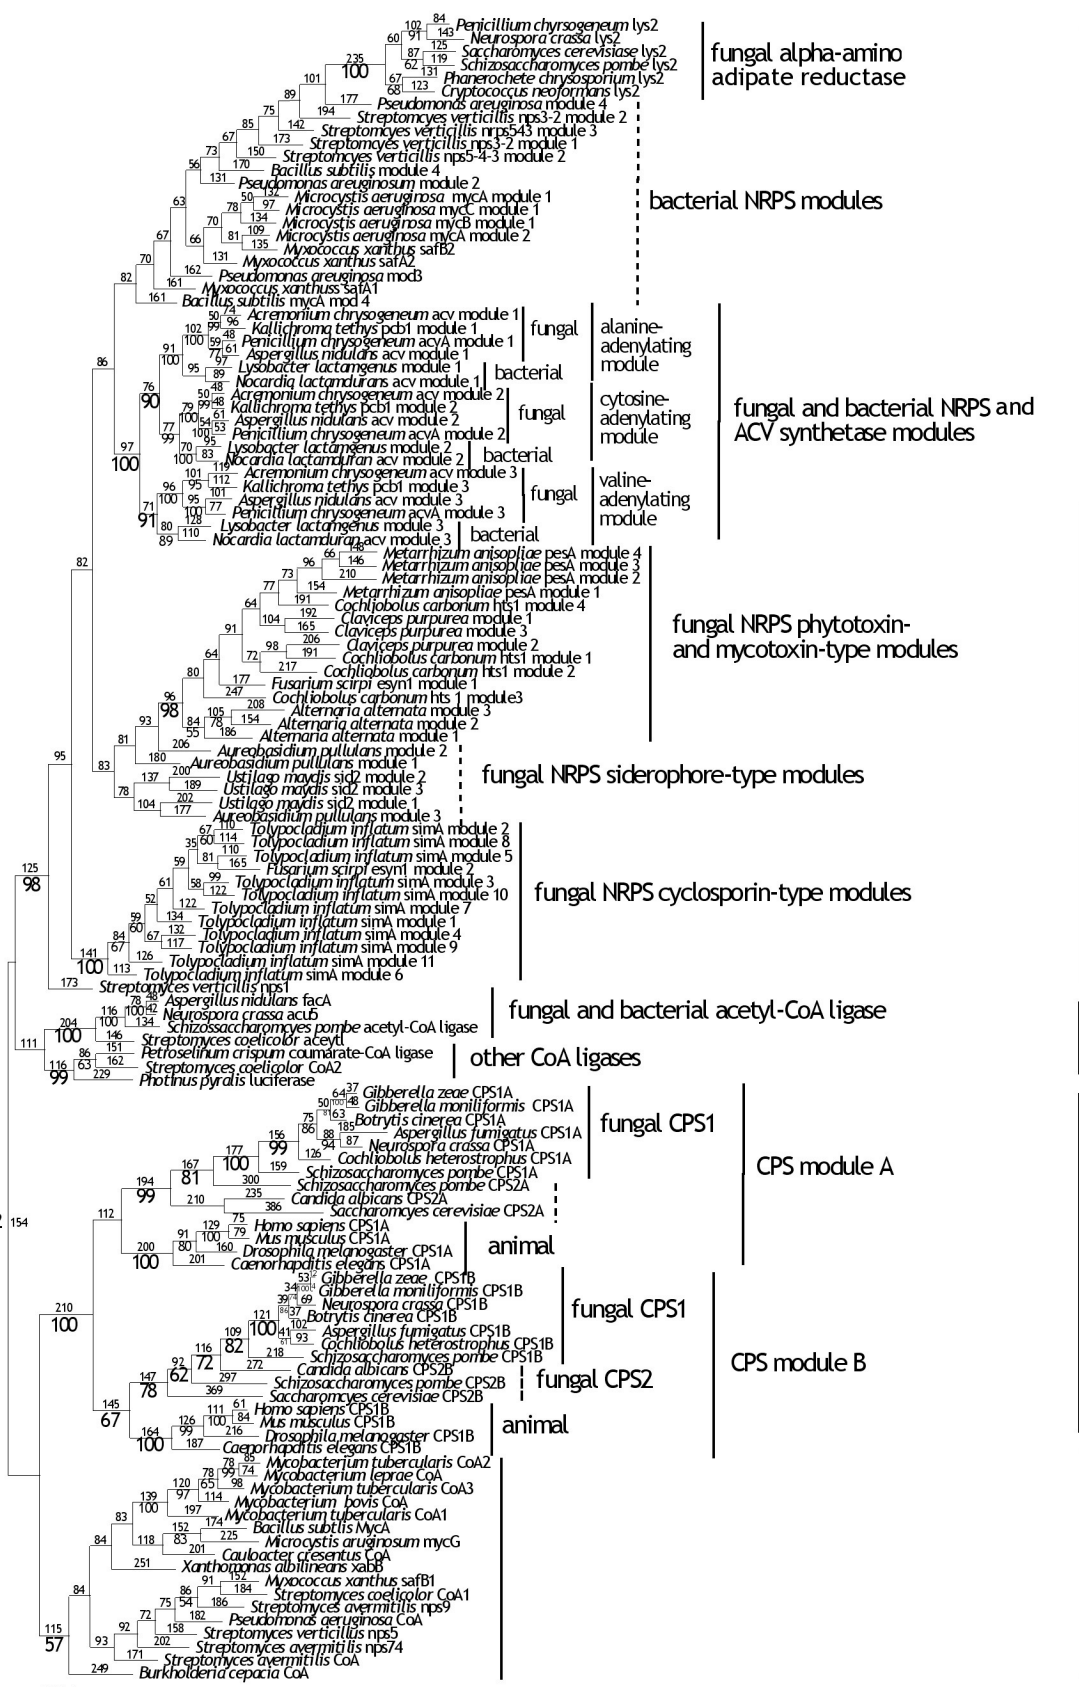

fungal alpha-amino  
adipate reductase

bacterial NRPS modules

fungal  
bacterial  
fungal  
bacterial  
fungal  
bacterial

alanine-  
adenylating  
module

cytosine-  
adenylating  
module

valine-  
adenylating  
module

fungal and bacterial NRPS and  
ACV synthetase modules

3) non-ribosomal peptide  
synthetase modules,  
and fungal alpha-amino  
adipate reductase

fungal NRPS phytotoxin-  
and mycotoxin-type modules

fungal NRPS siderophore-type modules

fungal NRPS cyclosporin-type modules

fungal and bacterial acetyl-CoA ligase

other CoA ligases

4) other CoA ligases  
and CoA synthetases

fungal CPS1

CPS module A

1) CPS modules

fungal CPS1

CPS module B

fungal CPS2

animal

animal

2) bacterial CoA ligase  
as N-terminal module  
of NRPSs, PKSs,  
and hybrid genes
