# Supplementary material
Source: PubMed Central journal article supplement (PMC156312)

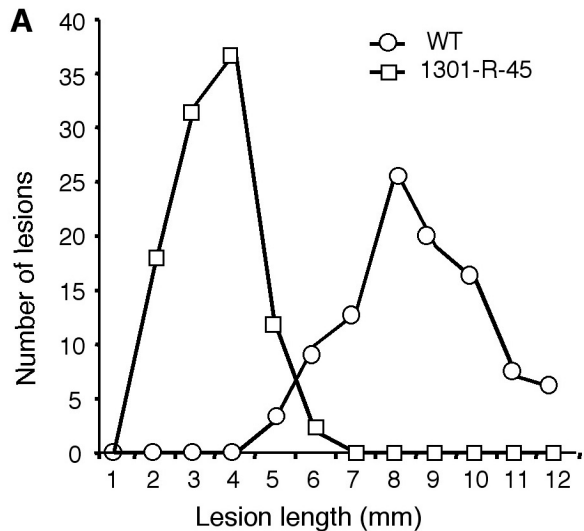

**B**

| Strain    | Lesion size (mm) |     |      | Mean | SD  |
|-----------|------------------|-----|------|------|-----|
|           | 1-4              | 5-8 | 9-12 |      |     |
| WT        | 0                | 52  | 48   | 8.5* | 1.0 |
| 1301-R-45 | 86               | 14  | 0    | 3.5* | 0.9 |

\* Significantly different from each other at  $P < 0.01$ .

Supplement: pnas_0931375100_10.pdf [file pnas_0931375100_10.pdf]
